# Supplementary material
Source: Springer Nature journal article supplement (https://www.springermedizin.de/resource/supplementary/12879_2009_1122_MOESM3_ESM.pdf/9441900)

**A**

○ NS1 positive (n=101)  
○ NS1 negative (n=37)

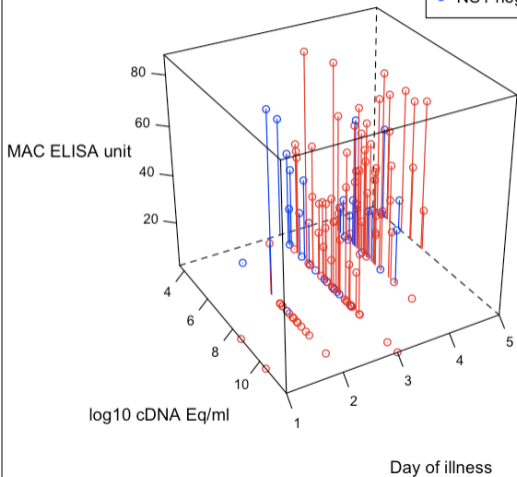**B**

○ NS1 positive (n=101)  
○ NS1 negative (n=37)

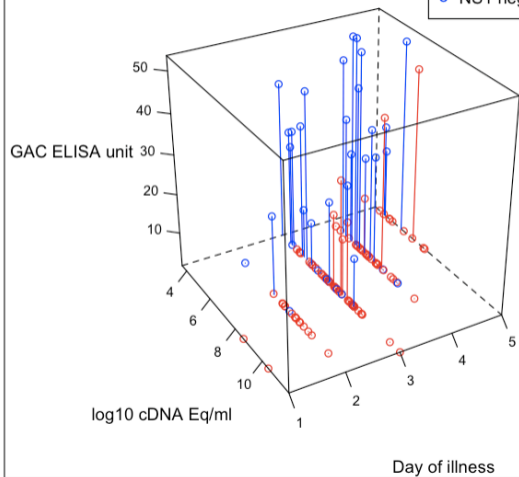

Supplement: MOESM3 [file 9441900]
